# Supplementary material for: Hsp110 is required for spindle length control
Source: PubMed Central journal article supplement — J Cell Biol. 2012 Aug 20;198(4):623–36. doi: 10.1083/jcb.201111105 (PMC3514029; doi:10.1083/jcb.201111105), 2012-08-20
Supplement: supp_jcb.201111105_JCB_201111105_sm.pdf [file supp_jcb.201111105_JCB_201111105_sm.pdf]

Makhnevych et al., <http://www.jcb.org/cgi/content/full/jcb.2011111105/DC1>

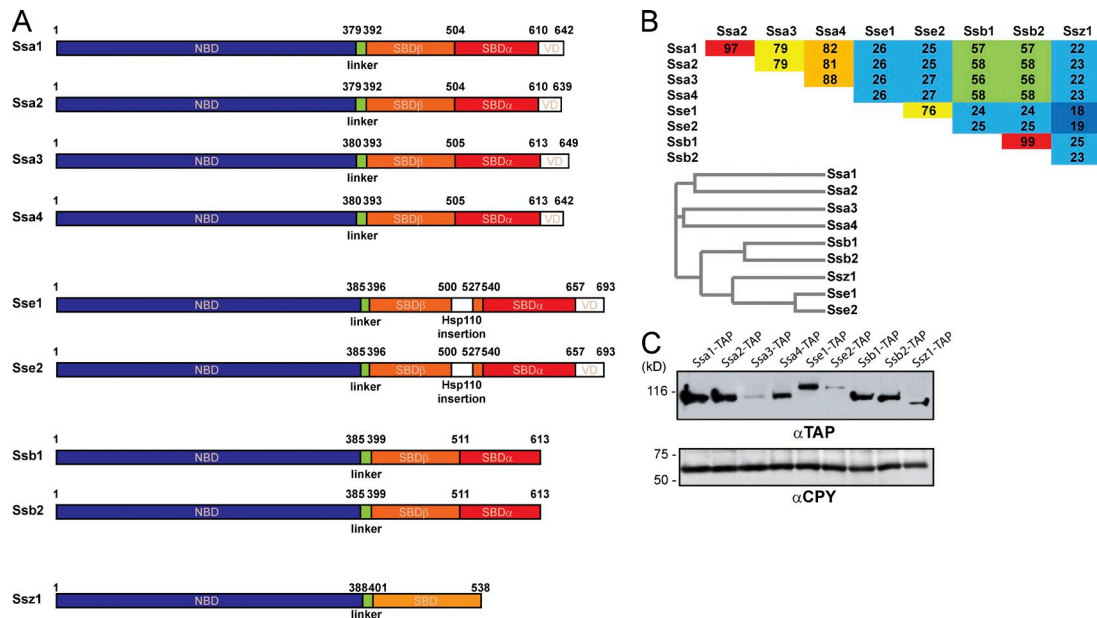

Figure S1. **The cytoplasmic yeast Hsp70s/Hsp110s.** (A) Domain arrangement of the nine Hsp70/Hsp110 chaperones. (B) Pairwise sequence similarity between the chaperones. Protein sequences were compared using ClustalW (default settings). The percentage of identities are shown, computed by taking the number of identical residues between each of the two sequences after alignment and dividing by the length of the larger protein. (C) Log-phase cells grown at 30°C in YPD media expressing endogenously C-terminally TAP-tagged Hsp70s/Hsp110s were analyzed by Western blot using antibodies directed against the TAP tag and carboxypeptidase Y (CPY). Molecular mass markers are shown on the left of the gels.

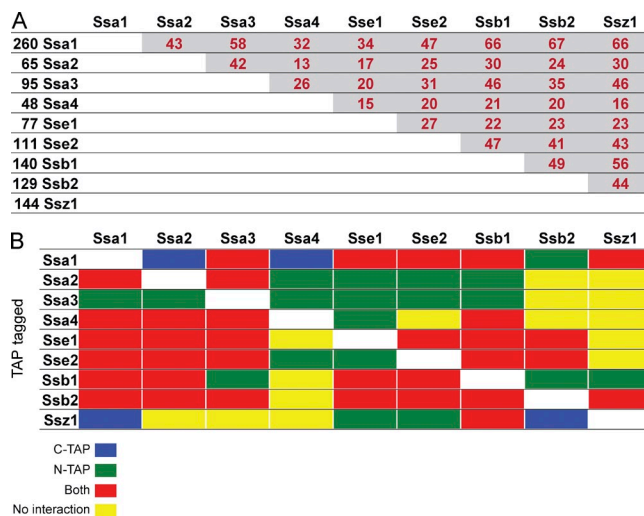

Figure S2. **The Hsp70-Hsp110 chaperone-chaperone interaction network.** (A) The table gives the total number of hits for each chaperone, listed on the vertical axis, and the number of hits that overlap between two chaperones. Data are based on experiments completed once. (B) TAP tag-based interaction between chaperones. The TAP-tagged chaperones are listed on the vertical axis. The different colors indicate whether the interaction was detected when the chaperone was N- or C-TAP tagged. For example, C-TAP-tagged Ssa1 pulled down Ssa4, whereas N-TAP-tagged Ssa1 pulled down Ssb2. Data are based on experiments completed once.

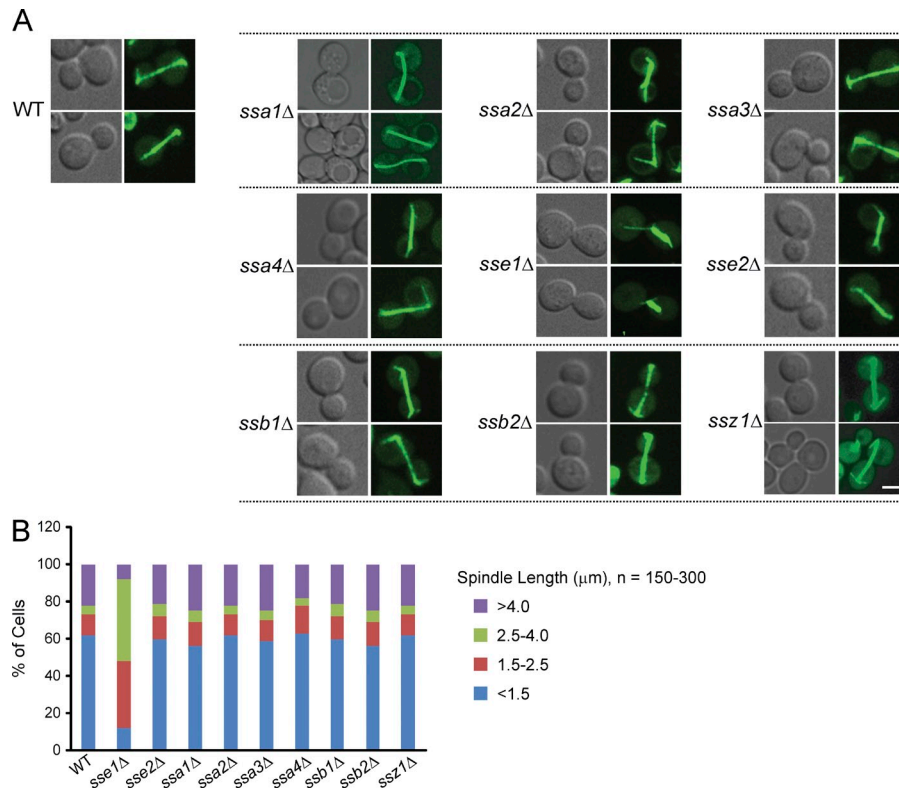

Figure S3. **Spindle morphology in different chaperone knockout strains.** (A) The morphology of the spindle in large budded cells grown in synthetic defined-URA media at 30°C was checked in WT and different knockout strains expressing GFP-Tub1 from the plasmid. Bar, 5  $\mu\text{m}$ . (B) Bar graph showing the distribution of spindle lengths observed in WT and chaperone-deleted cells. The results are based on measuring the spindle length of 150–300 cells. The data shown are from a single representative experiment out of three repeats.

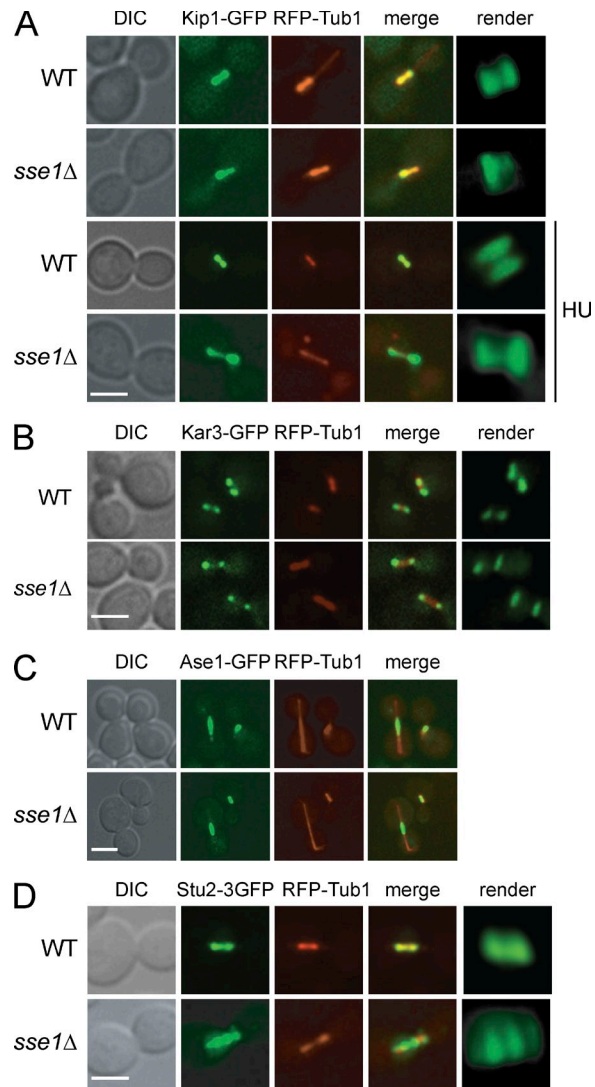

Figure S4. **The effect of *SSE1* deletion on Kip1, Kar3, Ase1, and Stu2 localization.** (A–D) Kip1-GFP (A), Kar3-GFP (B), Ase1-GFP (C), or Stu2-3GFP (D) WT and *sse1*Δ cells also expressing RFP-Tub1 were synchronized in S phase with HU for 2.5 h at 26°C and then imaged using fluorescence confocal microscopy. DIC, differential interference contrast. Bars, 5 μm.

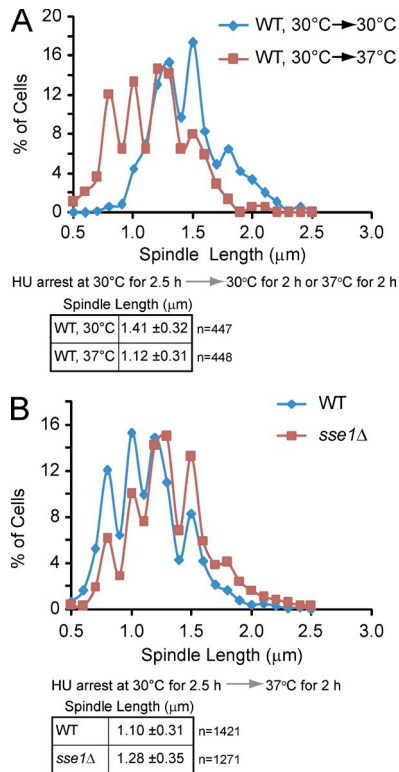

Figure S5. **The effect of heat shock on spindle length.** (A) Logarithmically growing WT cells expressing endogenously Spc42-RFP were synchronized in S phase using 100 mM HU for 1.5 h at 30°C. Half of the culture was then transferred to a new flask, and the temperature was shifted to 30°C (control) or 37°C for 2 h. Spindle length was measured using Spc42-RFP fluorescence. The data shown are from a single representative experiment out of three repeats. (B) Spindle length measurement in HU-arrested WT and *sse1* $\Delta$  cells at 37°C was performed as described in A. The data shown are from a single representative experiment out of three repeats.

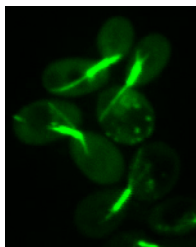

Video 1. **Time-lapse microscopy of the spindle.** Spindles were visualized in *sse1* $\Delta$  cells using plasmid-borne GFP-Tub1 and examined by time-lapse spinning-disk confocal microscopy. Images were captured using a spinning-disk confocal system (WaveFX) with an ultra-cooled 512 back-tinned EM charge-coupled device camera. Images were captured at room temperature after loading the cells on gelatin pads. Stacks of 11 optical sections spaced 0.3  $\mu\text{m}$  apart or 5 optical planes spaced 0.2  $\mu\text{m}$  apart were captured every 1 min for 40 min. GFP was excited using a 488-nm laser, and its emission was collected using a 505-nm long-pass filter. The magnification used was 63 $\times$ .

Table S1. Strains used in this study

| Strain | Genotype                                                                                  | Source                    |
|--------|-------------------------------------------------------------------------------------------|---------------------------|
| BY4741 | <i>MATa his3Δ1 leu2 Δ0 lys2 Δ0 ura3 Δ0 met15 Δ0</i>                                       | Brachmann et al., 1998    |
| BY4743 | <i>MATa/α his3 Δ1/his3 Δ1 leu2 Δ0/leu2 Δ0 LYS2/lys2 Δ0 met15 Δ0/MET15 ura3 Δ0/ura3 Δ0</i> | Brachmann et al., 1998    |
| TM028  | <i>MATa TAP-SSA1</i>                                                                      | This study                |
| TM029  | <i>MATa TAP-SSA2</i>                                                                      | This study                |
| TM030  | <i>MATa TAP-SSA3</i>                                                                      | This study                |
| TM031  | <i>MATa TAP-SSA4</i>                                                                      | This study                |
| TM032  | <i>MATa TAP-SSE1</i>                                                                      | This study                |
| TM033  | <i>MATa TAP-SSE2</i>                                                                      | This study                |
| TM034  | <i>MATa TAP-SSB1</i>                                                                      | This study                |
| TM035  | <i>MATa TAP-SSB2</i>                                                                      | This study                |
| TM036  | <i>MATa TAP-SSZ1</i>                                                                      | This study                |
| TM037  | <i>MATa ssa1::SSA1-TAP::HIS3</i>                                                          | Ghaemmaghami et al., 2003 |
| TM038  | <i>MATa ssa2::SSA2-TAP::HIS3</i>                                                          | Ghaemmaghami et al., 2003 |
| TM039  | <i>MATa ssa3::SSA3-TAP::HIS3</i>                                                          | Ghaemmaghami et al., 2003 |
| TM040  | <i>MATa ssa4::SSA4-TAP::HIS3</i>                                                          | Ghaemmaghami et al., 2003 |
| TM041  | <i>MATa sse1::SSE1-TAP::HIS3</i>                                                          | Ghaemmaghami et al., 2003 |
| TM042  | <i>MATa sse2::SSE2-TAP::HIS3</i>                                                          | Ghaemmaghami et al., 2003 |
| TM043  | <i>MATa ssb1::SSB1-TAP::HIS3</i>                                                          | Ghaemmaghami et al., 2003 |
| TM044  | <i>MATa ssb1::SSB2-TAP::HIS3</i>                                                          | Ghaemmaghami et al., 2003 |
| TM045  | <i>MATa ssz1::SSZ1-TAP::HIS3</i>                                                          | Ghaemmaghami et al., 2003 |
| TM003  | <i>MATa SSE1::NATR MAD2::KANR</i>                                                         | This study                |
| TM141  | <i>MATa SPC42-RFP::KANR SSE1::NATR pGFP-TUB1::URA3</i>                                    | This study                |
| TM003  | <i>MATα SSE1::NATR can1 Δ::STE2pr-Sp_his5 lyp1 Δ</i>                                      | Costanzo et al., 2010     |
| TM004  | <i>MATa SSE1::KANR</i>                                                                    | Winzeler et al., 1999     |
| TM136  | <i>MATa SSE1::NATR CIN8::KANR pGFP-TUB1</i>                                               | This study                |
| TM137  | <i>MATa SSE1::NATR KAR3::KANR</i>                                                         | This study                |
| TM117  | <i>MATa CIN8-GFP::HIS3 pRFP-TUB1</i>                                                      | This study                |
| TM118  | <i>MATa CIN8-GFP::HIS3 SSE1::NATR pRFP-TUB1</i>                                           | This study                |
| TM119  | <i>MATa KIP1-GFP::HIS3 pRFP-TUB1</i>                                                      | This study                |
| TM120  | <i>MATa KIP1-GFP::HIS3 SSE1::NATR pRFP-TUB1</i>                                           | This study                |
| TM146  | <i>MATa NDC80-GFP::HIS3 SPC42::KANR</i>                                                   | This study                |
| TM148  | <i>MATa NDC80-GFP::HIS3 SPC42::KANR SSE1::NATR</i>                                        | This study                |
| TM162  | <i>MATa ndc80-1 CIN8-GFP::HIS3 SPC42-RFP::KANR</i>                                        | This study                |
| TM163  | <i>MATa ndc80-1 CIN8-GFP::HIS3 SPC42-RFP::KANR SSE1::NATR</i>                             | This study                |
| TM151  | <i>MATa SSA1::KANR SSA2::NATR pGFP-TUB1</i>                                               | This study                |
| TM156  | <i>MATa ssa1::KANR sse1::NATR</i>                                                         | This study                |
| TM195  | <i>MATa ura3-52::mCherry-TUB1::URA3 cin8 ΔNLS-3xmyEGFP::hphNT6</i>                        | Roostalu et al., 2011     |
| TM200  | <i>MATa SSE1::NATR ura3-52::mCherry-TUB1::URA3 cin8 ΔNLS-3xmyEGFP::hphNT6</i>             | This study                |
| TM300  | <i>MATa ndc80-1::NATR ura3-52::mCherry-TUB1::URA3 cin8ΔNLS-3xmyEGFP::hphNT6</i>           | This study                |
| TM128  | <i>MATa ASE1-GFP::HIS3 pRFP-TUB1</i>                                                      | This study                |
| TM129  | <i>MATa ASE1-GFP::HIS3 SSE1::NATR pRFP-TUB1</i>                                           | This study                |
| TM130  | <i>MATa KAR3-GFP pRFP-TUB1</i>                                                            | This study                |
| TM131  | <i>MATa KAR3-GFP SSE1::NATR pRFP-TUB1</i>                                                 | This study                |
| TM139  | <i>MATa PDS1-18myc::LEU2</i>                                                              | Shirayama et al., 1998    |
| TM141  | <i>MATa PDS1-18myc::LEU2 SSE1::NATR</i>                                                   | This study                |
| TM202  | <i>MATa stu2-3GFP::HIS3MX6 pRFP-TUB1</i>                                                  | Wolyniak et al., 2006     |
| TM203  | <i>MATa stu2-3GFP::HIS3MX6 SSE1::NATR pRFP-TUB1</i>                                       | This study                |
| TM204  | <i>MATa promURA3::tetR::GFP::LEU2 CENIV::tetOX448::URA3 TUB1-mCherry::URA3</i>            | Liu et al., 2008          |
| TM205  | <i>MATa promURA3::tetR::GFP::LEU2 CENIV::tetOX448::URA3 TUB1-mCherry::URA3 SSE1::KANR</i> | This study                |

**Table S2 is provided as an Excel file and shows interactions identified in this study.**

**Table S3 is provided as an Excel file and shows interactions previously reported in published literature.**

**Table S4 is provided as an Excel file and shows hits obtained using both N- and C-TAP-tagged chaperones.**

## References

- Brachmann, C.B., A. Davies, G.J. Cost, E. Caputo, J. Li, P. Hieter, and J.D. Boeke. 1998. Designer deletion strains derived from *Saccharomyces cerevisiae* S288C: A useful set of strains and plasmids for PCR-mediated gene disruption and other applications. *Yeast*. 14:115–132. [http://dx.doi.org/10.1002/\(SICI\)1097-0061\(19980130\)14:2<115::AID-YEA204>3.0.CO;2-2](http://dx.doi.org/10.1002/(SICI)1097-0061(19980130)14:2<115::AID-YEA204>3.0.CO;2-2)
- Costanzo, M., A. Baryshnikova, J. Bellay, Y. Kim, E.D. Spear, C.S. Sevier, H. Ding, J.L. Koh, K. Toufighi, S. Mostafavi, et al. 2010. The genetic landscape of a cell. *Science*. 327:425–431. <http://dx.doi.org/10.1126/science.1180823>
- Ghaemmaghami, S., W.K. Huh, K. Bower, R.W. Howson, A. Belle, N. Dephoure, E.K. O’Shea, and J.S. Weissman. 2003. Global analysis of protein expression in yeast. *Nature*. 425:737–741. <http://dx.doi.org/10.1038/nature02046>
- Liu, H., F. Liang, F. Jin, and Y. Wang. 2008. The coordination of centromere replication, spindle formation, and kinetochore-microtubule interaction in budding yeast. *PLoS Genet*. 4:e1000262. <http://dx.doi.org/10.1371/journal.pgen.1000262>
- Roostalu, J., C. Hentrich, P. Bieling, I.A. Telley, E. Schiebel, and T. Surrey. 2011. Directional switching of the kinesin Cin8 through motor coupling. *Science*. 332:94–99. <http://dx.doi.org/10.1126/science.1199945>
- Shirayama, M., W. Zachariae, R. Ciosk, and K. Nasmyth. 1998. The Polo-like kinase Cdc5p and the WD-repeat protein Cdc20p/fizzy are regulators and substrates of the anaphase promoting complex in *Saccharomyces cerevisiae*. *EMBO J*. 17:1336–1349. <http://dx.doi.org/10.1093/emboj/17.5.1336>
- Winzeler, E.A., D.D. Shoemaker, A. Astromoff, H. Liang, K. Anderson, B. Andre, R. Bangham, R. Benito, J.D. Boeke, H. Bussey, et al. 1999. Functional characterization of the *S. cerevisiae* genome by gene deletion and parallel analysis. *Science*. 285:901–906. <http://dx.doi.org/10.1126/science.285.5429.901>
- Wolyniak, M.J., K. Blake-Hodek, K. Kosco, E. Hwang, L. You, and T.C. Huffaker. 2006. The regulation of microtubule dynamics in *Saccharomyces cerevisiae* by three interacting plus-end tracking proteins. *Mol. Biol. Cell*. 17:2789–2798. <http://dx.doi.org/10.1091/mbc.E05-09-0892>
